# Supplementary material for: Impact of maternal age on neonatal outcomes among very preterm infants admitted to Chinese neonatal intensive care units: a multi-center cohort study
Source: PubMed Central journal article supplement — Transl Pediatr. 2022 Jul;11(7):1130–9. doi: 10.21037/tp-22-1 (PMC9360824; doi:10.21037/tp-22-1), 2022-07
Supplement: tp-11-07-1130-dss.pdf [file tp-11-07-1130-dss.pdf]

## Data Sharing Statement

|                     |                                                                                                                                                    |                                                           |
|---------------------|----------------------------------------------------------------------------------------------------------------------------------------------------|-----------------------------------------------------------|
| <b>Article Info</b> | <a href="https://dx.doi.org/10.21037/tp-22-1">https://dx.doi.org/10.21037/tp-22-1</a> .                                                            |                                                           |
| <b>Item</b>         | <b>Question</b>                                                                                                                                    | <b>Authors' Response</b><br>(place “–” if not applicable) |
| 1                   | Would you like to share data collected for your study to others?                                                                                   | No                                                        |
| 2                   | If not, would you like to share the reason for your decision?                                                                                      | Our data will be used for follow-up study.                |
| 3                   | What data in particular will be shared?                                                                                                            | No                                                        |
| 4                   | Any other documents will be share? Such as study protocol, statistical analysis plan, informed consent form, clinical study report, analytic code. | No                                                        |
| 5                   | When will data availability begin?                                                                                                                 | Until the follow-up study finished.                       |
| 6                   | When will data availability end?                                                                                                                   | –                                                         |
| 7                   | To whom will you share the data?                                                                                                                   | –                                                         |
| 8                   | For what type of analysis or purpose?                                                                                                              | –                                                         |

|    |                                                  |    |
|----|--------------------------------------------------|----|
| 9  | How or where can the data/documents be obtained? | -  |
| 10 | Any other restrictions?                          | No |
