# Supplementary material for: Impact of maternal age on neonatal outcomes among very preterm infants admitted to Chinese neonatal intensive care units: a multi-center cohort study
Source: PubMed Central journal article supplement — Transl Pediatr. 2022 Jul;11(7):1130–9. doi: 10.21037/tp-22-1 (PMC9360824; doi:10.21037/tp-22-1), 2022-07
Supplement: tp-11-07-1130-rc.pdf [file tp-11-07-1130-rc.pdf]

## STROBE Statement—checklist of items that should be included in reports of observational studies

| Section/item                 | Item No | Recommendation                                                                                                                                                                                                                                                                                                                                                                                                                                 | Reported on Page Number/Line Number                              | Reported on Section/Paragraph                        |
|------------------------------|---------|------------------------------------------------------------------------------------------------------------------------------------------------------------------------------------------------------------------------------------------------------------------------------------------------------------------------------------------------------------------------------------------------------------------------------------------------|------------------------------------------------------------------|------------------------------------------------------|
| Title and abstract           | 1       | (a) Indicate the study's design with a commonly used term in the title or the abstract                                                                                                                                                                                                                                                                                                                                                         | Page 1/ Line 3-4                                                 | Title                                                |
|                              |         | (b) Provide in the abstract an informative and balanced summary of what was done and what was found                                                                                                                                                                                                                                                                                                                                            | Page 3/ Line 55-63<br>Page 4/ Line 77-81                         | Abstract/Para 2<br>Abstract/Para 4                   |
| Introduction                 |         |                                                                                                                                                                                                                                                                                                                                                                                                                                                |                                                                  |                                                      |
| Background/<br>rationale     | 2       | Explain the scientific background and rationale for the investigation being reported                                                                                                                                                                                                                                                                                                                                                           | Page 5/ Line 91-110<br>Page 6/ Line 111                          | Introduction/Para 1-2                                |
| Objectives                   | 3       | State specific objectives, including any prespecified hypotheses                                                                                                                                                                                                                                                                                                                                                                               | Page 6/ Line 111-114                                             | Introduction/Para 2                                  |
| Methods                      |         |                                                                                                                                                                                                                                                                                                                                                                                                                                                |                                                                  |                                                      |
| Study design                 | 4       | Present key elements of study design early in the paper                                                                                                                                                                                                                                                                                                                                                                                        | Page 1/ Line 3-4<br>Page 6/ Line 117-119                         | Title<br>Study design and setting/Para 1             |
| Setting                      | 5       | Describe the setting, locations, and relevant dates, including periods of recruitment, exposure, follow-up, and data collection                                                                                                                                                                                                                                                                                                                | Page 6/ Line 117-126                                             | Study design and setting/Para 1                      |
| Participants                 | 6       | (a) Cohort study—Give the eligibility criteria, and the sources and methods of selection of participants. Describe methods of follow-up<br>Case-control study—Give the eligibility criteria, and the sources and methods of case ascertainment and control selection. Give the rationale for the choice of cases and controls<br>Cross-sectional study—Give the eligibility criteria, and the sources and methods of selection of participants | Page 7/ Line 132-136                                             | Study Population/Para 1                              |
|                              |         | (b) Cohort study—For matched studies, give matching criteria and number of exposed and unexposed<br>Case-control study—For matched studies, give matching criteria and the number of controls per case                                                                                                                                                                                                                                         | N/A                                                              | This study was not a matched study                   |
| Variables                    | 7       | Clearly define all outcomes, exposures, predictors, potential confounders, and effect modifiers. Give diagnostic criteria, if applicable                                                                                                                                                                                                                                                                                                       | Page 7/ Line 141-152<br>Page 8/ Line 153<br>Page 8/ Line 155-166 | Definitions/Para 1<br>Outcomes/Para 1                |
| Data sources/<br>measurement | 8*      | For each variable of interest, give sources of data and details of methods of assessment (measurement). Describe comparability of assessment methods if there is more than one group                                                                                                                                                                                                                                                           | Page 8/ Line 168-169                                             | Statistical Analysis/Para 1                          |
| Bias                         | 9       | Describe any efforts to address potential sources of bias                                                                                                                                                                                                                                                                                                                                                                                      | Page 6/ Line 117-126<br>Page 7/ Line 138-139                     | Study design and setting/<br>Data collection/Para 1  |
| Study size                   | 10      | Explain how the study size was arrived at                                                                                                                                                                                                                                                                                                                                                                                                      | Page 6/ Line 119-125<br>Page 7/ Line 132-136                     | Study design and setting/<br>Study Population/Para 1 |
| Quantitative variables       | 11      | Explain how quantitative variables were handled in the analyses. If applicable, describe which groupings were chosen and why                                                                                                                                                                                                                                                                                                                   | Page 8/ Line 168-169                                             | Statistical Analysis/Para 1                          |

|                     |     |                                                                                                                                                                                                                                                                                   |                                                                    |                                              |
|---------------------|-----|-----------------------------------------------------------------------------------------------------------------------------------------------------------------------------------------------------------------------------------------------------------------------------------|--------------------------------------------------------------------|----------------------------------------------|
| Statistical methods | 12  | (a) Describe all statistical methods, including those used to control for confounding                                                                                                                                                                                             | Page 8/ Line 169-173<br>Page 9/ Line 174-189                       | Statistical Analysis/Para 1                  |
|                     |     | (b) Describe any methods used to examine subgroups and interactions                                                                                                                                                                                                               | N/A                                                                | No subgroup analysis was applicable          |
|                     |     | (c) Explain how missing data were addressed                                                                                                                                                                                                                                       | Page 7/ Line 133-136                                               | Study Population/Para 1                      |
|                     |     | (d) Cohort study—If applicable, explain how loss to follow-up was addressed<br>Case-control study—If applicable, explain how matching of cases and controls was addressed<br>Cross-sectional study—If applicable, describe analytical methods taking account of sampling strategy | N/A                                                                | All infants were followed to NICU discharge. |
|                     |     | (e) Describe any sensitivity analyses                                                                                                                                                                                                                                             | Page 9/ Line 182-189                                               | Statistical Analysis/Para 1                  |
| Results             |     |                                                                                                                                                                                                                                                                                   |                                                                    |                                              |
| Participants        | 13* | (a) Report numbers of individuals at each stage of study—eg numbers potentially eligible, examined for eligibility, confirmed eligible, included in the study, completing follow-up, and analysed                                                                                 | Page 9/ Line 193-194<br>Page 10/ Line 195-198<br>Figure 1          | Results/Para 1<br>Figures                    |
|                     |     | (b) Give reasons for non-participation at each stage                                                                                                                                                                                                                              | Page 9/ Line 193-194<br>Page 10/ Line 195-198                      | Results/Para 1                               |
|                     |     | (c) Consider use of a flow diagram                                                                                                                                                                                                                                                | Figure 1                                                           | Figures                                      |
| Descriptive data    | 14* | (a) Give characteristics of study participants (eg demographic, clinical, social) and information on exposures and potential confounders                                                                                                                                          | Page 10/ Line 199-211<br>Table 1                                   | Results/Para 2<br>Tables                     |
|                     |     | (b) Indicate number of participants with missing data for each variable of interest                                                                                                                                                                                               | Table 1                                                            | Tables                                       |
|                     |     | (c) Cohort study—Summarise follow-up time (eg, average and total amount)                                                                                                                                                                                                          | N/A                                                                | All infants were followed until discharge.   |
| Outcome data        | 15* | Cohort study—Report numbers of outcome events or summary measures over time                                                                                                                                                                                                       | Page 10/ Line 212-213<br>Table 2                                   | Results/Para 3<br>Tables                     |
|                     |     | Case-control study—Report numbers in each exposure category, or summary measures of exposure                                                                                                                                                                                      | N/A                                                                | Not a case-control study                     |
|                     |     | Cross-sectional study—Report numbers of outcome events or summary measures                                                                                                                                                                                                        | N/A                                                                | Not a cross-sectional study                  |
| Main results        | 16  | (a) Give unadjusted estimates and, if applicable, confounder-adjusted estimates and their precision (eg, 95% confidence interval). Make clear which confounders were adjusted for and why they were included                                                                      | Page 10/ Line 211-212<br>Page 11/ Line 213-217<br>Table 3/ Table 4 | Results/Para 3<br>Tables                     |
|                     |     | (b) Report category boundaries when continuous variables were categorized                                                                                                                                                                                                         | Page 8/ Line 165-166<br>Table 3/ Table 4                           | Statistical Analysis/Para 1<br>Tables        |
|                     |     | (c) If relevant, consider translating estimates of relative risk into absolute risk for a meaningful time period                                                                                                                                                                  | Page 10/ Line 214-215<br>Page 11/ Line 216                         | Results/Para 3                               |
| Other analyses      | 17  | Report other analyses done—eg analyses of subgroups and interactions, and sensitivity analyses                                                                                                                                                                                    | Table 3<br>Table 4                                                 | Tables                                       |
| Discussion          |     |                                                                                                                                                                                                                                                                                   |                                                                    |                                              |
| Key results         | 18  | Summarise key results with reference to study objectives                                                                                                                                                                                                                          | Page 11/ Line 229-234                                              | Discussion/Para 1                            |
| Limitations         | 19  | Discuss limitations of the study, taking into account sources of potential bias or imprecision. Discuss both direction and magnitude of any potential bias                                                                                                                        | Page 14/ Line 293-299<br>Page 15/ Line 300-302                     | Discussion/Para 5                            |

|                   |    |                                                                                                                                                                            |                       |                        |
|-------------------|----|----------------------------------------------------------------------------------------------------------------------------------------------------------------------------|-----------------------|------------------------|
| Interpretation    | 20 | Give a cautious overall interpretation of results considering objectives, limitations, multiplicity of analyses, results from similar studies, and other relevant evidence | Page 15/ Line 303-306 | Discussion/Para 6      |
| Generalisability  | 21 | Discuss the generalisability (external validity) of the study results                                                                                                      | Page 15/ Line 301-302 | Discussion/Para 5      |
| Other information |    |                                                                                                                                                                            |                       |                        |
| Funding           | 22 | Give the source of funding and the role of the funders for the present study and, if applicable, for the original study on which the present article is based              | Page 15/ Line 316-317 | Acknowledgments/Para 1 |

\*Give information separately for cases and controls in case-control studies and, if applicable, for exposed and unexposed groups in cohort and cross-sectional studies.

Note: An Explanation and Elaboration article discusses each checklist item and gives methodological background and published examples of transparent reporting. The STROBE checklist is best used in conjunction with this article (freely available on the Web sites of PLoS Medicine at <http://www.plosmedicine.org/>, Annals of Internal Medicine at <http://www.annals.org/>, and Epidemiology at <http://www.epidem.com/>). Information on the STROBE Initiative is available at [www.strobe-statement.org](http://www.strobe-statement.org).

Article information: <https://dx.doi.org/10.21037/tp-22-1>

\*As the checklist was provided upon initial submission, the page number/line number reported may be changed due to copyediting and may not be referable in the published version. In this case, the section/paragraph may be used as an alternative reference.
